# Effects of Clopidogrel on Mortality, Cardiovascular and Bleeding Outcomes in Patients with Chronic Kidney Disease - Data from Taiwan Acute Coronary Syndrome Full Spectrum Registry

Tsung-Hsien Lin<sup>1,2</sup>, Wen-Ter Lai<sup>1,2\*</sup>, Ho-Tsung Hsin<sup>3</sup>, Ai-Hsien Li<sup>3</sup>, Chun-Li Wang<sup>4,5</sup>, Chi-Tai Kuo<sup>4,5</sup>, Juey-Jen Hwang<sup>6</sup>, Fu-Tien Chiang<sup>6</sup>, Shu-Chen Chang<sup>7</sup>, on behalf of ACS Full Spectrum Registry Investigators<sup>†</sup>

**1** Division of Cardiology, Department of Internal Medicine, Kaohsiung Medical University Hospital, Kaohsiung, Taiwan, **2** Faculty of Medicine, College of Medicine, Kaohsiung Medical University, Kaohsiung, Taiwan, **3** Division of Cardiology, Cardiovascular Center, Far Eastern Memorial Hospital, Taipei, Taiwan, **4** College of Medicine, Chang Gung University, Taoyuan, Taiwan, **5** Cardiovascular Division, Department of Internal Medicine, Linkou Chang Gung Memorial Hospital, Taoyuan, Taiwan, **6** Division of Cardiology, Department of Internal Medicine, National Taiwan University Hospital, Taipei, Taiwan, **7** Division of Biostatistics, Institute of Public Health, National Yang-Ming University, Taipei, Taiwan

## Abstract

**Background:** The efficacy of clopidogrel is inconclusive in the chronic kidney disease (CKD) population with acute coronary syndrome (ACS). Furthermore, CKD patients are prone to bleeding with antiplatelet therapy. We investigated the efficacy and safety of clopidogrel in patients with ACS and CKD.

**Methods:** In a Taiwan national-wide registry, 2819 ACS patients were enrolled. CKD is defined as an estimated glomerular filtration rate of less than 60 ml/min per 1.73 m<sup>2</sup>. The primary endpoints are the combined outcomes of death, non-fatal myocardial infarction and stroke at 12 months.

**Results:** Overall 949 (33.7%) patients had CKD and 2660 (94.36%) patients received clopidogrel treatment. CKD is associated with increased risk of the primary endpoint at 12 months (HR 2.39, 95% CI 1.82 to 3.15, p<0.01). Clopidogrel use is associated with reduced risk of the primary endpoint at 12 months (HR 0.42, 95% CI: 0.29–0.60, p<0.01). Cox regression analysis showed that clopidogrel reduced death and primary endpoints for CKD population (HR 0.35, 95% CI: 0.21–0.61 and HR 0.48, 95% CI: 0.30–0.77, respectively, both p<0.01). Patients with clopidogrel(-)/CKD(-), clopidogrel(+)/CKD(+) and clopidogrel(-)/CKD(+) have 2.4, 3.0 and 10.4 fold risk to have primary endpoints compared with those receiving clopidogrel treatment without CKD (all p<0.01). Clopidogrel treatment was not associated with increased in-hospital Thrombolysis In Myocardial Infarction (TIMI) bleeding in CKD population.

**Conclusion:** Clopidogrel could decrease mortality and improve cardiovascular outcomes without increasing risk of bleeding in ACS patients with CKD.

**Citation:** Lin T-H, Lai W-T, Hsin H-T, Li A-H, Wang C-L, et al. (2013) Effects of Clopidogrel on Mortality, Cardiovascular and Bleeding Outcomes in Patients with Chronic Kidney Disease - Data from Taiwan Acute Coronary Syndrome Full Spectrum Registry. PLoS ONE 8(8): e71917. doi:10.1371/journal.pone.0071917

**Editor:** Claudio Moretti, S.G.Battista Hospital, Italy

**Received:** February 25, 2013; **Accepted:** July 4, 2013; **Published:** August 28, 2013

**Copyright:** © 2013 Lin et al. This is an open-access article distributed under the terms of the Creative Commons Attribution License, which permits unrestricted use, distribution, and reproduction in any medium, provided the original author and source are credited.

**Funding:** This study was supported by the Sanofi-Aventis Taiwan Co. Ltd. and Bristol-Myers Squibb (Taiwan) Ltd. The funders had no role in study design, data collection and analysis, decision to publish, or preparation of the manuscript.

**Competing Interests:** Although this research is partly sponsored by Sanofi-Aventis company, the data is independently analyzed by the investigators. This does not alter the authors' adherence to all the PLOS ONE policies on sharing data and materials. The authors declare no conflict of interest.

\* E-mail: wtlai@kmu.edu.tw

† Membership of the ACS Full Spectrum Registry Investigators is provided in the Acknowledgments.

## Introduction

Cardiovascular disease (CVD) accounted for approximately one-third of all global deaths [1]. The prevalence of CVD has increased considerably in Asian countries over the past several decades as a result of shifts toward a more “westernized” lifestyle. In Taiwan, the CVD is the second most common cause of mortality since 2010 [2]. Acute coronary syndrome (ACS) is the most severe form of CVD. Because of its major impact on morbidity and mortality, as well as its contribution to annual health care costs, it is of the utmost importance to improve

strategies for reducing cardiovascular events (CVE) and preventing complication development.

In ACS aggressive anti-platelet and anti-coagulation therapies have been recently developed and can reduce future CVE but may increase the risk of bleeding. Bleeding events have been associated with mortality in studies of ACS and percutaneous coronary intervention (PCI) [3,4]. Because lower body weight could be associated with bleeding complication in the ACS, weight-adjusted dose of anti-thrombotic agent is recommended in the international ACS guidelines [5,6]. Compared with the Cauca-

**Table 1.** Baseline characteristics between those with and without CKD.

| Number (%) / Mean (SD)                   | CKD (N = 949) | Non-CKD (N = 1870) | All (N = 2819) | p value |
|------------------------------------------|---------------|--------------------|----------------|---------|
| Sex (male)                               | 679 (71.55%)  | 1551 (82.94%)      | 2230 (79.11%)  | <0.01 * |
| Age (year)                               | 69.5 (11.90)  | 59.5 (13.06)       | 62.9 (13.54)   | <0.01 * |
| <b>Killip</b>                            |               |                    |                |         |
| Class 1                                  | 347 (46.51%)  | 1059 (68.77%)      | 1406 (61.50%)  | <0.01 * |
| Class 2                                  | 135 (18.10%)  | 267 (17.34%)       | 402 (17.59%)   |         |
| Class 3                                  | 132 (17.69%)  | 113 (7.34%)        | 245 (10.72%)   |         |
| Class 4                                  | 132 (17.69%)  | 101 (6.56%)        | 233 (10.19%)   |         |
| <b>Blood pressure (mmHg)</b>             |               |                    |                |         |
| SBP                                      | 139.1 (36.73) | 139.5 (30.53)      | 139.3 (32.73)  | 0.754   |
| DBP                                      | 79.0 (22.62)  | 83.5 (19.72)       | 82.0 (20.84)   | <0.01 * |
| Heart rate (beat per minute)             | 86.5 (26.04)  | 79.8 (19.81)       | 82.1 (22.32)   | <0.01 * |
| Height (cm)                              | 162.8 (8.18)  | 164.6 (7.65)       | 164.0 (7.88)   | <0.01 * |
| Weight (kg)                              | 66.1 (12.47)  | 69.9 (12.82)       | 68.6 (12.82)   | <0.01 * |
| Waist circumference                      | 90.1 (10.15)  | 90.6 (9.30)        | 90.4 (9.57)    | 0.495   |
| Serum creatinine (mg/dL)                 | 3.0 (2.63)    | 1.0 (0.19)         | 1.6 (1.81)     | <0.01 * |
| Dyslipidemia                             | 376 (39.96%)  | 717 (38.67%)       | 1093 (39.11%)  | 0.511   |
| Hypertension                             | 723 (76.91%)  | 1053 (56.80%)      | 1776 (63.56%)  | <0.01 * |
| <b>Diabetes</b>                          |               |                    |                |         |
| Diet treatment only                      | 35 (7.22%)    | 60 (12.05%)        | 95 (9.66%)     | 0.010 * |
| Medical treatment                        | 499 (52.92%)  | 513 (27.57%)       | 1012 (36.09%)  | <0.01 * |
| <b>Smoker</b>                            |               |                    |                |         |
| Current                                  | 269 (28.92%)  | 914 (49.65%)       | 1183 (42.69%)  | <0.01 * |
| Former                                   | 197 (21.18%)  | 267 (14.50%)       | 464 (16.74%)   |         |
| Never                                    | 464 (49.89%)  | 660 (35.85%)       | 1124 (40.56%)  |         |
| Family history                           | 102 (14.93%)  | 383 (25.95%)       | 485 (22.46%)   | <0.01 * |
| Previous CAD                             | 317 (33.40%)  | 358 (19.14%)       | 675 (23.94%)   | <0.01 * |
| Previous heart failure                   | 94 (9.91%)    | 54 (2.89%)         | 148 (5.25%)    | <0.01 * |
| Previous cerebrovascular accident        | 134 (14.12%)  | 118 (6.31%)        | 252 (8.94%)    | <0.01 * |
| PCI                                      | 745 (78.59%)  | 1645 (88.11%)      | 2390 (84.90%)  | <0.01 * |
| CABG                                     | 40 (4.21%)    | 56 (2.99%)         | 96 (3.41%)     | 0.091   |
| <b>In-hospital cardiovascular events</b> |               |                    |                |         |
| Death                                    | 27 (2.85%)    | 8 (0.43%)          | 35 (1.24%)     | <0.01 * |
| Re-infarction                            | 12 (1.26%)    | 9 (0.48%)          | 21 (0.74%)     | 0.022 * |
| Stroke                                   | 4 (0.42%)     | 6 (0.32%)          | 10 (0.35%)     | 0.671   |
| Acute renal failure                      | 47 (4.95%)    | 6 (0.32%)          | 53 (1.88%)     | <0.01 * |
| TIMI major/minor bleeding                | 29 (3.06%)    | 24 (1.28%)         | 53 (1.88%)     | <0.01 * |
| Major                                    | 9 (31.03%)    | 8 (33.33%)         | 17 (32.08%)    | 0.858   |
| Minor                                    | 20 (68.97%)   | 16 (66.67%)        | 36 (67.92%)    |         |

CKD, Chronic kidney disease; SBP, Systolic blood pressure; DBP, diastolic blood pressure; CAD, coronary artery disease; TIMI, thrombolysis in myocardial infarction; PCI, percutaneous coronary intervention; CABG, coronary artery bypass grafting.  
doi:10.1371/journal.pone.0071917.t001

sian, Asian population usually have lower body weight and might possibly suffer from anti-thrombotic and anti-platelet overdose and therefore bleeding complication.

Chronic kidney disease (CKD) is a risk factor for coronary heart disease and bleeding with antithrombotic therapy in patients with ACS [7,8]. Although clopidogrel decreases cardiovascular events in patients suffering from ACS, its effect is inconclusive in the CKD population. Furthermore, patients with CKD are more prone to bleeding when receiving antiplatelet therapy. Therefore, we sought to determine the efficacy and safety of in-hospital and

long-term clopidogrel therapy in patients with ACS and CKD in a prospective cohort in an Asia endemic area of kidney disease [9].

## Methods

### Study Design

The study was a prospective, national, multicenter, non-interventional, observational design. Patients recruitment and definition of ACS had been previously described in detail [10]. Patients' data, such as baseline characteristics, risk factors, clinical

**Table 2.** Baseline characteristics between those with and without clopidogrel.

| Number (%) / Mean (SD)                   | Clopidogrel (+)<br>(N = 2,660) | Clopidogrel (-)<br>(N = 159) | All (N = 2,819) | p value |
|------------------------------------------|--------------------------------|------------------------------|-----------------|---------|
| Sex (male)                               | 2114(79.47%)                   | 116(72.96%)                  | 2230(79.11%)    | 0.050 * |
| Age (year)                               | 62.60 ± 13.55                  | 67.48 ± 12.55                | 62.87 ± 13.54   | <0.01 * |
| <b>Killip</b>                            |                                |                              |                 |         |
| Class 1                                  | 1358(61.62%)                   | 48(58.54%)                   | 1406(61.50%)    |         |
| Class 2                                  | 388(17.60%)                    | 14(17.07%)                   | 402(17.59%)     |         |
| Class 3                                  | 233(10.57%)                    | 12(14.63%)                   | 245(10.72%)     |         |
| Class 4                                  | 225(10.21%)                    | 8(9.76%)                     | 233(10.19%)     |         |
| <b>Blood pressure (mmHg)</b>             |                                |                              |                 |         |
| SBP                                      | 139.09 ± 32.70                 | 143.43 ± 33.09               | 139.33 ± 32.73  | 0.114   |
| DBP                                      | 81.92 ± 20.87                  | 83.15 ± 20.41                | 81.99 ± 20.84   | 0.484   |
| Heart rate (beat per minute)             | 81.64 ± 22.05                  | 89.88 ± 25.45                | 82.09 ± 22.32   | <0.01 * |
| Height (cm)                              | 164.12 ± 7.85                  | 161.99 ± 8.12                | 164.00 ± 7.88   | <0.01 * |
| Weight (kg)                              | 68.78 ± 12.72                  | 65.74 ± 14.12                | 68.61 ± 12.82   | <0.01 * |
| Waist circumference                      | 90.48 ± 9.50                   | 89.94 ± 10.60                | 90.44 ± 9.57    | 0.704   |
| Serum creatinine (mg/dL)                 | 1.62 ± 1.79                    | 2.05 ± 2.11                  | 1.64 ± 1.81     | <0.01 * |
| Dyslipidemia                             | 1021(38.73%)                   | 72(45.28%)                   | 1093(39.11%)    | 0.100   |
| Hypertension                             | 1653(62.73%)                   | 123(77.36%)                  | 1776(63.56%)    | <0.01 * |
| Diabetes                                 | 935(35.35%)                    | 77(48.43%)                   | 1012(36.09%)    | <0.01 * |
| Diet treatment only                      | 91(10.00%)                     | 4(5.48%)                     | 95(9.66%)       | 0.208   |
| Medical treatment                        | 935 (35.35%)                   | 77 (48.43%)                  | 1012 (36.09%)   | <0.01 * |
| <b>Smoker</b>                            |                                |                              |                 |         |
| Current                                  | 1144(43.68%)                   | 39(25.66%)                   | 1183(42.69%)    | <0.01 * |
| Former                                   | 426(16.27%)                    | 38(25.00%)                   | 464(16.74%)     |         |
| Never                                    | 1049(40.05%)                   | 75(49.34%)                   | 1124(40.56%)    |         |
| Family history                           | 468(22.99%)                    | 17(13.82%)                   | 485(22.46%)     | 0.018 * |
| Previous CAD                             | 602(22.63%)                    | 73(45.91%)                   | 675(23.94%)     | <0.01 * |
| Previous heart failure                   | 133(5.00%)                     | 15(9.43%)                    | 148(5.25%)      | 0.015 * |
| Previous cerebrovascular accident        | 230(8.65%)                     | 22(13.84%)                   | 252(8.94%)      | 0.026 * |
| PCI                                      | 2291(86.19%)                   | 99(63.06%)                   | 2390(84.90%)    | <0.01 * |
| CABG                                     | 88(3.31%)                      | 8(5.03%)                     | 96(3.41%)       | 0.245   |
| CKD                                      |                                |                              |                 | 0.245   |
| Stage 5                                  | 174(20.00%)                    | 20(25.32%)                   | 194(20.44%)     |         |
| Stage 4                                  | 119(13.68%)                    | 14(17.72%)                   | 133(14.01%)     |         |
| Stage 3                                  | 577 (66.32%)                   | 45 (56.96%)                  | 622 (65.54%)    |         |
| <b>In-hospital cardiovascular events</b> |                                |                              |                 |         |
| Death                                    | 32(1.20%)                      | 3(1.89%)                     | 35(1.24%)       | 0.449   |
| Re-infarction                            | 18(0.68%)                      | 3(1.89%)                     | 21(0.74%)       | 0.085   |
| Stroke                                   | 9(0.34%)                       | 1(0.63%)                     | 10(0.35%)       | 0.549   |
| Acute renal failure                      | 45(1.69%)                      | 8(5.03%)                     | 53(1.88%)       | <0.01 * |
| TIMI Major/Minor Bleeding                | 46(1.73%)                      | 7(4.40%)                     | 53(1.88%)       | 0.016 * |
| Major                                    | 13(28.26%)                     | 4(57.14%)                    | 17(32.08%)      | 0.127   |
| Minor                                    | 33(71.74%)                     | 3(42.86%)                    | 36(67.92%)      |         |

SBP, Systolic blood pressure; DBP, diastolic blood pressure; CAD, coronary artery disease; TIMI, thrombolysis in myocardial infarction; PCI, percutaneous coronary intervention; CABG, coronary artery bypass grafting; CKD, chronic kidney disease.  
doi:10.1371/journal.pone.0071917.t002

presentation, clinical diagnosis, in-hospital interventions as well as medications prescribed, were collected from admission to discharge. Use of clopidogrel or not was based on patients' records. Patients were followed up at months 3, 6, 9 and 12 post-

discharge and data was collected on medication usage, revascularization strategy as well as clinical events, like death, myocardial infarction (MI), stroke, revascularization and hospitalization. Monitoring for source documentation and accuracy was per-

formed in 5% of all case report forms at each recruiting site. This study was carried out in accordance with the local regulatory guidelines and international guidelines for Good Epidemiological Practice [11]. Ethics committee approval was obtained at all trial sites including China University Medical Hospital, Taoyuan General Hospital, Wan-Fang Hospital, Show Chwan Memorial Hospital, Chia-Yi Christian Hospital, Kuang Tien General Hospital, National Taiwan University Hospital, Cheng Ching Hospital, Sin Lau Hospital The Presbyterian Church of Taiwan, Tainan Municipal Hospital, Mackay Memorial Hospital, E-Da Hospital, Chi-Mei Hospital, Taichung Armed Forces General Hospital, Taipei Tzu Chi General Hospital, Kaohsiung Medical University Chung-Ho Memorial Hospital, Taichung Veterans General Hospital, Pingtung Christian Hospital, Lo-Tung Po-Ai Hospital, Far Eastern Memorial Hospital, National Cheng Kung University Hospital, National Taiwan University Hospital, Yun-lin Branch, Dalin Tzuchi General Hospital, Kee-lung Hospital, Taipei Veterans General Hospital, Cathay General Hospital, Kaohsiung Veterans General Hospital, Taipei Medical University Hospital, Shin Kong Wu Ho-Su Memorial Hospital, Changhua Christian Hospital, National Taiwan University Hospital, Chung Shan Medical University Hospital, Hualien Tzu Chi General Hospital, Mackay Memorial Hospital, Taitung Branch, Linkou Chang Gung Memorial Hospital, Hsin Chu General Hospital, Kaohsiung Chang Gung Memorial Hospital, Tri-Service General Hospital and Cheng-Hsin Hospital. Written informed consent was given by the patients for their information to be stored in the hospital database and used for research.

### Thrombolysis In Myocardial Infarction (TIMI) Bleeding Classification

TIMI bleeding classification includes major and minor bleeding. TIMI major bleeding is defined as patients with intracranial hemorrhage or a  $\geq 5$  g/dl decrease in the hemoglobin concentration or a  $\geq 15\%$  absolute decrease in the hematocrit. If observed blood loss with  $\geq 3$  g/dl decrease in the hemoglobin concentration or  $\geq 10\%$  decrease in the hematocrit or no observed blood loss with  $\geq 4$  g/dl decrease in the hemoglobin concentration or  $\geq 12\%$  decrease in the hematocrit, it is defined as TIMI minor bleeding [12].

### Calculation of Kidney Function and Definition of CKD

The estimated glomerular filtration rate (GFR) was calculated using the Modification of Diet in Renal Disease (MDRD) Study equation  $[GFR = 186.3 \times (\text{serum creatinine in mg/dl})^{-1.154} \times (\text{age})^{-0.203} \times (0.742 \text{ if female})]$  [13]. Chronic kidney disease was defined as a GFR less than 60 ml/min per 1.73 m<sup>2</sup>. This range corresponds to stage 3 or higher CKD by the National Kidney Foundation's classification scheme and helps identify individuals with clinically significant CKD [14]. All serum creatinines were measured at admission.

### Outcomes

The primary outcome was the composite CVE of death, non-fatal myocardial infarction and non-fatal stroke at one year. The secondary outcome was TIMI bleeding at discharge. The net clinical in-hospital outcome (NCIO) was defined as composite endpoint of death, non-fatal myocardial infarction, non-fatal stroke and in-hospital TIMI bleeding. We analyzed the whole, CKD and non-CKD populations separately.

### Statistical Analysis

All data were expressed as mean  $\pm$  standard deviation (SD). For comparability between groups, a chi-square test was used for categorical variables and analysis of variance (ANOVA) was adopted for continuous variables. One-year CVE analysis was performed using Kaplan-Meier survival curves and the log-rank test. Univariate and Cox regression analysis were conducted to calculate odd ratio (OR) and hazard ratio (HR) for in-hospital bleeding (IHB) or CVE. Analyses were conducted as time to first event without double counting of events within analyses involving composite endpoints. The adjusted variables in Cox regression analysis included age, gender, Killip class, hypertension, diabetes mellitus, smoking, family history of cardiovascular disease, prior myocardial infarction, prior heart failure, prior cerebrovascular accident and revascularization, including coronary intervention and bypass grafting, or not during index admission.

Statistical analysis was performed using SAS software version 9.2 (SAS Institute Inc., Cary, NC, USA). All statistical analyses

**Table 3.** Multivariable-adjusted odd ratios for the association between clopidogrel use and in-hospital cardiovascular events.

| Outcome/odds ratio (95% CI)                                                            | Unadjusted       | Model I          | Model II         |
|----------------------------------------------------------------------------------------|------------------|------------------|------------------|
| <b>Death, Re-MI and Stroke</b>                                                         |                  |                  |                  |
| Overall cohort                                                                         | 0.56(0.24–1.32)  | 0.66(0.28–1.55)  | 1.11(0.25–5.05)  |
| CKD                                                                                    | 1.16(0.35–3.84)  | 1.24(0.37–4.14)  | 2.25(0.26–19.58) |
| Non-CKD                                                                                | 0.28(0.08–0.95)* | 0.28(0.08–0.99)* | 0.41(0.05–3.62)  |
| <b>TIMI bleeding (major+minor)</b>                                                     |                  |                  |                  |
| Overall cohort                                                                         | 0.38(0.17–0.86)* | 0.44(0.19–0.99)* | 0.50(0.14–1.82)  |
| CKD                                                                                    | 0.55(0.19–1.64)  | 0.59(0.20–1.74)  | 1.66(0.19–14.72) |
| Non-CKD                                                                                | 0.30(0.09–1.04)  | 0.32(0.09–1.10)  | 0.10(0.02–0.57)* |
| <b>Death, Re-MI, Stroke and TIMI bleeding (Net clinical in-hospital outcome, NCIO)</b> |                  |                  |                  |
| Overall cohort                                                                         | 0.43(0.24–0.78)* | 0.50(0.27–0.91)* | 0.67(0.24–1.83)  |
| CKD                                                                                    | 0.75(0.33–1.70)  | 0.80(0.35–1.82)  | 1.77(0.37–8.57)  |
| Non-CKD                                                                                | 0.27(0.11–0.67)* | 0.28(0.12–0.70)* | 0.20(0.05–0.80)* |

Model 1: adjusted for age and sex. Model 2: adjusted for age, gender, Killip class, hypertension, diabetes mellitus, smoking, family history of cardiovascular disease, prior myocardial infarction, prior heart failure, prior cerebrovascular accident.

\*,  $p < 0.05$ .

doi:10.1371/journal.pone.0071917.t003

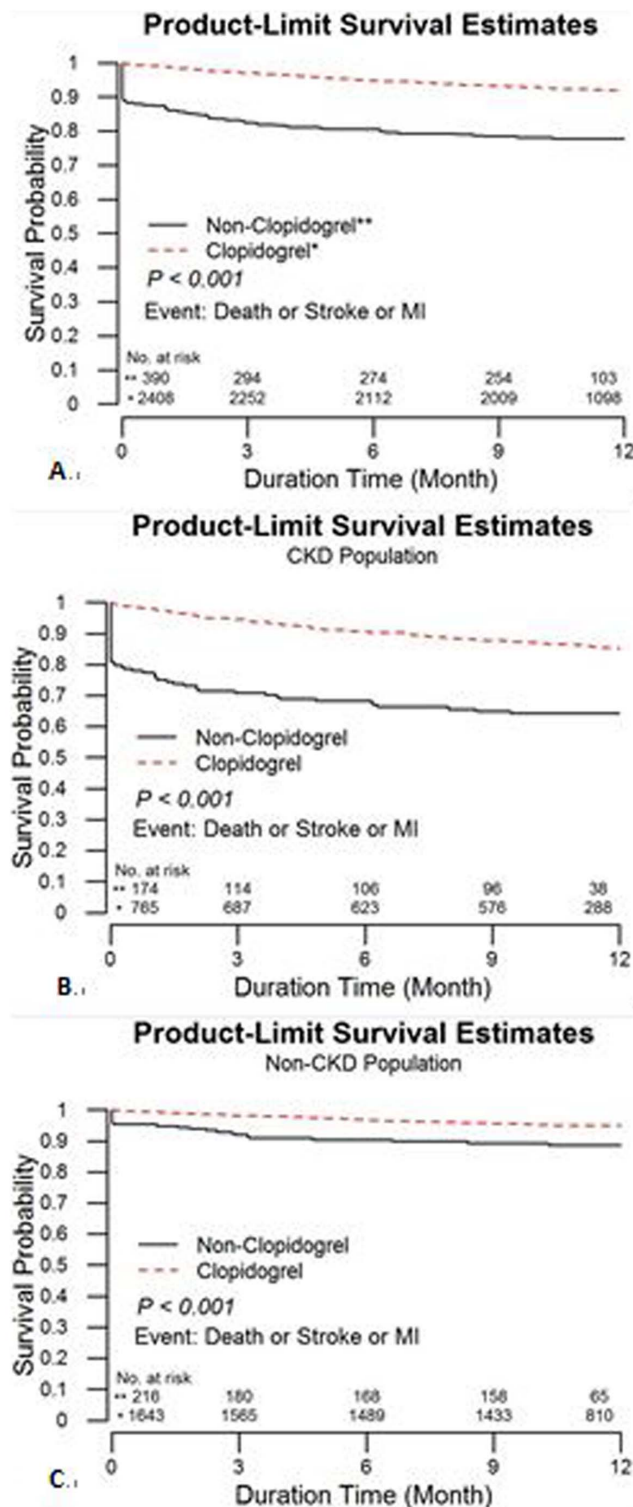

**Figure 1. Kaplan-Meier curves of clopidogrel on primary cardiovascular events at 12 months (A) Overall, (B) CKD, (C) non-CKD.**

doi:10.1371/journal.pone.0071917.g001

were performed using an level of  $<0.05$  with two-sided testing and this was considered as statistically significant.

## Results

### Clinical Characteristics

A total of 3183 eligible patients were enrolled between October 2008 and January 2010 at 39 medical centers and regional hospitals in Taiwan. Among them, 2819 (88.6% of 3183) subjects with renal parameters and 12 months outcome data were analyzed in this study and 1537 (54.5% of 2819) patients were ST-segment elevation acute coronary syndrome (STE-ACS). The subjects included 2230 men and 589 women (male 79.11%). Mean age was  $62.9 \pm 13.5$  years old.

Overall 949 (33.7% of 2819) patients had CKD. Baseline creatinines were  $3.0 \pm 2.6$  and  $1.0 \pm 0.2$  mg/dl in the CKD ( $n = 949$ ) and non-CKD ( $n = 1870$ ) groups. Compared with non-CKD subjects, those with CKD were older, shorter and thinner, had less male sex, higher grade of Killip class, lower diastolic blood pressure, faster heart rate at presentation. They also had more comorbidity including hypertension, diabetes, previous coronary artery disease (CAD), stroke and heart failure but lower percentage of smoking and family history of CAD (Table 1).

Overall 2595 (92.05% of 2819) and 2660 (94.36% of 2819) patients received aspirin and clopidogrel treatment, respectively. Compared with subjects without clopidogrel use, those receiving clopidogrel treatment were younger, more male sex, current smoker, taller, higher body weight and percentage of family history of CAD but lower heart rate, serum creatinine, percentage of hypertension, diabetes, prior CAD, stroke and heart failure at presentation. There is no statistical significance among CKD stages between two groups ( $p = 0.245$ ) (Table 2).

### In-hospital Cardiovascular Outcomes

During admission patients with CKD had more death and re-infarction (2.85% vs 0.43% and 1.26% vs 0.48%,  $p < 0.01$  and  $p = 0.022$ , respectively) but similar stroke risk (0.42% vs. 0.32%,  $p = 0.671$ ) compared with non-CKD subjects (Table 1). Furthermore, CKD subjects had higher risk of TIMI bleeding (3.06% vs 1.28%,  $p < 0.01$ ).

At discharge the unadjusted odd ratio (OR) of clopidogrel use for the primary endpoint, TIMI bleeding and NCIO are 0.56 (95% CI : 0.24–1.32,  $p = 0.183$ ), 0.38 (95% CI: 0.17–0.86,  $p = 0.020$ ) and 0.43 (95% CI: 0.24–0.78,  $p < 0.01$ ) respectively in the whole population. The benefit of clopidogrel use is statistically significant in the non-CKD population for the TIMI bleeding and NCIO (OR 0.10, 95% CI: 0.02–0.57 and OR 0.20, 95% CI: 0.05–0.80, both  $p < 0.01$ ) but not in the CKD population after adjusting age, gender, Killip class, hypertension, diabetes mellitus, smoking, family history of cardiovascular disease, prior myocardial infarction, heart failure and stroke (Table 3).

### Cardiovascular Outcomes at 12 Months

The percentage of aspirin use was not statistically significant between those with and without primary outcome (94.53% and 94.34%,  $p = 0.900$ ). Kaplan-Meier survival analysis showed that clopidogrel use was associated with lower primary endpoints for the whole, CKD and non-CKD populations at 12 months than the non-clopidogrel use population (all  $p < 0.01$ ) (Figure 1). Cox regression analysis found the HR of use of clopidogrel in the whole, CKD and non-CKD populations are 0.32 [95% confidence interval (CI) : 0.23–0.46,  $p < 0.01$ ], 0.36 (CI: 0.23–0.56,  $p < 0.01$ ) and 0.35 (CI: 0.20–0.62,  $p < 0.01$ ) respectively for the primary endpoints. The association remained statistically significant in the

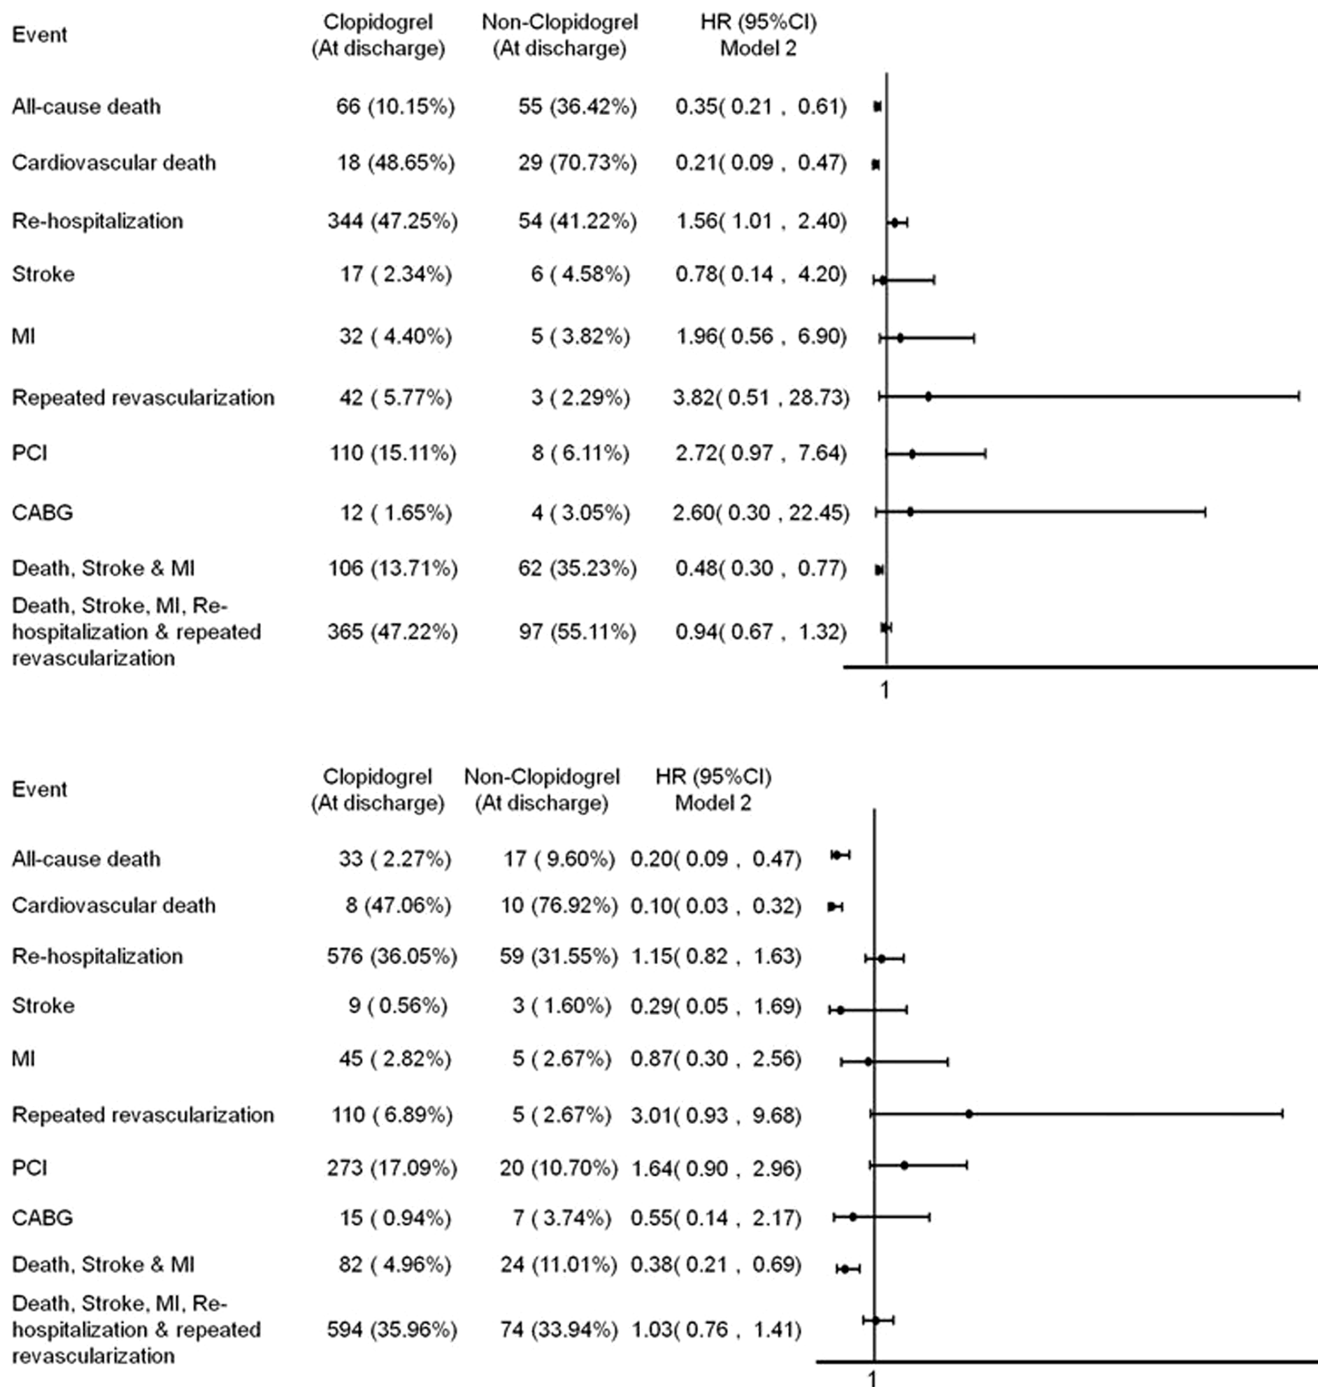

**Figure 2. Effect of clopidogrel on cardiovascular events at 12 months (A) CKD, (B) non-CKD.** \*Adjusted with age, gender, Killip class, hypertension, diabetes mellitus, smoking, family history of cardiovascular disease, prior myocardial infarction, prior heart failure, prior cerebrovascular accident and revascularization including coronary intervention and bypass grafting or not during index admission.  
doi:10.1371/journal.pone.0071917.g002

whole, CKD and non-CKD populations [HR 0.42 (95% CI : 0.29–0.60), 0.48 (CI: 0.30–0.77) and 0.38 (CI: 0.21–0.69), respectively, all  $p < 0.01$ ] for the primary endpoints after adjusting age, gender, Killip class, hypertension, diabetes mellitus, smoking, family history of cardiovascular disease, prior myocardial infarction, prior heart failure, prior cerebrovascular accident and revascularization, including coronary intervention and bypass

grafting, during index admission. Most importantly death is significantly lower in the patients receiving clopidogrel treatment in the CKD and non-CKD populations after adjusting above variables (Figure 2).

**Table 4.** Association between clopidogrel use and CKD on primary endpoint at 12 months.

| Groups N (%)                | 1 endpoint (+) (N = 274) | 1 endpoint (-) (N = 2545) | OR(95% CI) <sup>a</sup> | p value |
|-----------------------------|--------------------------|---------------------------|-------------------------|---------|
| Clopidogrel use(+)/CKD (-)  | 82 (4.96%)               | 1570 (95.04%)             | 1                       | –       |
| Clopidogrel use (+)/CKD (+) | 106 (13.71%)             | 667 (86.29%)              | 3.04 (2.25, 4.12)       | <0.01*  |
| Clopidogrel use (-)/CKD (-) | 24 (11.01%)              | 194 (88.99%)              | 2.37 (1.47, 3.82)       | <0.01*  |
| Clopidogrel use (-)/CKD (+) | 62 (35.23%)              | 114 (64.77%)              | 10.41 (7.12, 15.24)     | <0.01*  |

CKD, chronic kidney bleeding.

doi:10.1371/journal.pone.0071917.t004

### Clopidogrel Use and CKD Interaction on Cardiovascular Outcome

CKD is independently associated with a significantly increase of primary endpoint after adjusting age, sex and medication at 12 months (OR 2.17, 95% CI: 1.63 to 2.87,  $p < 0.01$ ). We found an additively detrimental effect on the CVE between no use of clopidogrel and CKD on the occurrence of primary endpoint at 12 months (Table 4). In non-CKD patients, no use of clopidogrel increases the risk of primary endpoint (OR 2.37, 95% CI: 1.47–3.82;  $p < 0.01$ ). When patients receiving clopidogrel treatment, CKD patients had a 3.04-fold risk of primary endpoint (OR 3.04, 95% CI: 2.25–4.12;  $p < 0.01$ ), but CKD patients without clopidogrel treatment had a 10.41-fold risk for primary endpoint (OR 10.41, 95% CI: 7.12–15.24;  $p < 0.01$ ), compared to the non-CKD patients taking clopidogrel.

### Discussion

There are three major findings in this cohort study. First, patients receiving clopidogrel treatment had lower risk of death at 12 months both in the CKD and non-CKD groups. Second, clopidogrel treatment is not only associated with better cardiovascular outcome in the non-CKD population but also in the CKD population at 12 months follow-up. Third, patients with CKD and no clopidogrel treatment had the worst prognosis during 12 months follow-up. Furthermore, they had additively detrimental effect on the cardiovascular outcome.

### CKD and ACS Outcomes

Taiwan has been recognized as an endemic area of kidney disease with the highest incidence and prevalence rates of ESRD in the world [9]. Because patients with CKD have more comorbidity, their treatment strategy in ACS is more complicated. As shown in our study CKD is a poor prognosis factor for those with ACS, possibly because of more extensive and severe atherosclerosis coronary tree with plaque composed of greater necrotic core and less fibrous tissue in the CKD than non-CKD subjects [15,16,17]. Furthermore, underuse of reperfusion therapy, fear of contrast-induced nephropathy during coronary procedure, fewer guideline-recommended treatments prescribed and more comorbidities may partly explain why CKD population had poor prognosis in the ACS [18,19,20].

### Antiplatelet Effect of Clopidogrel in CKD

The antiplatelet effects of aspirin, clopidogrel and dual combination were reported to have conflict results in the CKD population. Recent studies have shown that CKD is accompanied by a low platelet inhibitory response to clopidogrel administration [21,22]. Ticagrelor and adjunctive cilostazol were suggested to counteract the ineffective of clopidogrel in the CKD population [23,24]. However, Kaufman et al. found clopidogrel significantly

inhibits ADP-induced platelet aggregation even in subjects receiving chronic maintenance hemodialysis [25]. Cuisset et al. also found that no significant difference between patients with or without CKD by two platelet function tests in ACS population [26]. Furthermore, compared with non-CKD patients, CKD patients were found to have lower response to aspirin therapy but the platelet response to dual-antiplatelet therapy was not different between CKD and non-CKD patients [27]. Our data showed clopidogrel is beneficial not only in the non-CKD population but also in the CKD subjects.

### Clopidogrel and Cardiovascular Outcome in CKD Population

In the CURE trial clopidogrel was beneficial and safe in patients with and without chronic kidney disease [28]. However, clopidogrel in mild or moderate CKD patients may not have the same beneficial effect as it does in patients with normal renal function in the CREDO trial [29]. Furthermore, retrospective study found a low response to clopidogrel might be a risk factor for the poorer outcomes in patients with stage 3 to 5 CKD compared with patients with better renal function [30]. Meta-analysis had also shown little or no effect on all-cause or cardiovascular mortality or on myocardial infarction after add-on clopidogrel in patients with CKD [31]. Because of conflict data, more studies are needed to clarify the effect of clopidogrel on the cardiovascular disease in the CKD population. Although we had no bench data to show the antiplatelet effect of clopidogrel in the CKD population, CKD patients receiving clopidogrel treatment also have lower cardiovascular events as in the non-CKD population in the real-world study.

### In-hospital Bleeding and ACS Outcome

In-hospital bleeding (IHB) is associated with short-, intermediate-, and long-term mortality among patients hospitalized for ACS [3,4,32]. Patients with IHB after primary PCI in ST segment elevation ACS have significantly increased 3-year rates of morbidity and mortality [33]. The deleterious effect of major bleeding was observed within 1 month, between 1 month and 1 year, and between 1 and 3 years. In patients with non-ST segment elevation ACS cumulative mortality was also higher in those who had bleeding vs. those without bleeding at 30 days, 1 year, and 3 years [32]. In our study patients receiving clopidogrel had no increase the risk of in-hospital TIMI bleeding in the whole, CKD and non-CKD population even after adjusting the related variables. Our data could support to safely use clopidogrel in the CKD population in the ACS.

### Limitations

This study has three main limitations. Firstly, it is a nonrandomized, observational and post-hoc analysis study.

Furthermore, there were few patients not treated with clopidogrel in this study. Nonetheless, this study provides valuable real-world data on the current practices across the full spectrum of ACS in a CKD endemic area, which could help to improve the ACS management in the CKD population. Second, we did not evaluate the antiplatelet effects of clopidogrel, which might provide the data for individualized therapy in the CKD population. Third, the renal endpoint and bleeding events were not routinely collected after discharge in this registry. Whether those with clopidogrel had better renal outcome is unknown.

## Conclusion

In this real-world registry we found patients receiving clopidogrel treatment had lower risk of death and cardiovascular events at 12 months not only in the non-CKD but also in the CKD population. Patients with CKD and no clopidogrel treatment had the worst outcome. Furthermore, they had additively detrimental effect on the cardiovascular outcome. Thus, clopidogrel use and preventing CKD in ACS patients are important for the eventual cardiovascular risk reduction.

## Acknowledgments

We would like to thank participating physicians and nurses for their contribution in conducting the registry. This manuscript was partly presented at 2012 American Heart Association annual meeting, Los Angeles, California, USA.

**ACS Full Spectrum Registry Principle Investigators:** Kuan-Chen Chang, China University Medical Hospital; Chia-Lin Chao, Taoyuan General Hospital, Department of Health; Yi-Jen Chen, Wan-Fang Hospital; Chien-Cheng Chen, Show Chwan Memorial Hospital;

Cheng-Yun Chen, Chia-Yi Christian Hospital; Chung-Yin Chen, Kuang Tien General Hospital; Fu-Tien Chiang, National Taiwan University Hospital; Shao-Yueh Chiang, Cheng Ching Hospital; Li-Ping Chou, Sin Lau Hospital The Presbyterian Church of Taiwan; Ching-Chang Feng, Tainan Municipal Hospital; Charles Jia-Yin Hou, Mackay Memorial Hospital; Kwan-Li Hsu, E-Da Hospital; Tsuei-Yuan Huang, Chi-Mei Hospital; Gwo-Ping Jong, Taichung Armed Forces General Hospital; Yu-Lin Ko, Taipei Tzu Chi General Hospital; Wen-Ter Lai, Kaohsiung Medical University Chung-Ho Memorial Hospital; Wen-Lieng Lee, Taichung Veterans General Hospital; Chun-I Lee, Pingtung Christian Hospital; Meng-Huan Lei, Lo-Tung Po-Ai Hospital; Ai-Hsien Li, Far Eastern Memorial Hospital; Yi-Heng Li, National Cheng Kung University Hospital; Jou-Wei Lin, National Taiwan University Hospital, Yun-lin Branch; Tin-Kwang Lin, Dalin Tzuchi General Hospital; Jih-Min Lin, Kee-lung Hospital, Department of Health; Shing-Jong Lin, Taipei Veterans General Hospital; Hung-Shun Lo, Cathay General Hospital; Guang-Yuan Mar, Kaohsiung Veterans General Hospital; Chun-Ming Shih, Taipei Medical University Hospital; Kou-Gi Shyu, Shin Kong Wu Ho-Su Memorial Hospital; Cheng-Dao Tsai, Changhua Christian Hospital; Chuen-Den Tseng, National Taiwan University Hospital; Kwo-Chang Ueng, Chung Shan Medical University Hospital; Ji-Hung Wang, Hualien Tzu Chi General Hospital; Kuang-Te Wang, Mackay Memorial Hospital, Taitung Branch; Ming-Shien Wen, Linkou Chang Gung Memorial Hospital; Szu-Chi Wen, Hsin Chu General Hospital, Department of Health; Chiung-Jen Wu, Kaohsiung Chang Gung Memorial Hospital; Shih-Peng Yang, Tri-Service General Hospital; Wei-Hsian Yin, Cheng-Hsin Hospital.

## Author Contributions

Conceived and designed the experiments: THL WTL. Performed the experiments: THL WTL HTH AHL CLW CTK JJH FTC. Analyzed the data: SCC. Contributed reagents/materials/analysis tools: THL WTL HTH AHL CLW CTK JJH FTC. Wrote the paper: THL.

## References

- Nordlie MA, Wold LE, Kloner RA (2005) Genetic contributors toward increased risk for ischemic heart disease. *J Mol Cell Cardiol.* 39(4): 667–79.
- Taiwan Department of Health. Statistics data. Statistical analysis of 2009 mortality data. Press conference on 2009 mortality data. Available: <http://www.doh.gov.tw>. Accessed 2011 Jan 19.
- Budaj A, Eikelboom JW, Mehta SR, Afzal R, Chrolavicius S, et al. (2009) Improving clinical outcomes by reducing bleeding in patients with non-ST-elevation acute coronary syndromes. *Eur Heart J.* 30: 655–661.
- Lindsey JB MS, Pencina M, Stolker JM, Kennedy KF, Rihal C, et al. (2009) Prognostic importance of bleeding and myocardial infarction after percutaneous coronary intervention in unselected patients. *JACC Interv.* 2: 1074–1082.
- Wiviott SD, Braunwald E, McCabe CH, Montalescot G, Ruzyllo W, et al. (2007) Prasugrel versus clopidogrel in patients with acute coronary syndromes. *N Engl J Med.* 357(20): 2001–15.
- Melloni C, Alexander KP, Chen AY, Newby LK, Roe MT, et al. (2008) Unfractionated heparin dosing and risk of major bleeding in non-ST-segment elevation acute coronary syndromes. *Am Heart J.* 156(2): 209–15.
- Chronic Kidney Disease Prognosis Consortium, Matsushita K, van der Velde M, Astor BC, Woodward M, et al. (2010) Association of estimated glomerular filtration rate and albuminuria with all-cause and cardiovascular mortality in general population cohorts: a collaborative meta-analysis. *Lancet.* 375(9731): 2073–81.
- Mehran R, Pocock SJ, Nikolsky E, Clayton T, Dangas GD, et al. (2010) A risk score to predict bleeding in patients with acute coronary syndromes. *J Am Coll Cardiol.* 55(23): 2556–66.
- USRDS. International comparisons (2009) In: United States Renal Data System Annual Data Report. Bethesda, MD: The National Institute of Health, National Institute of Diabetes and Digestive and Kidney Disease. 344–55.
- Shyu KG, Wu CJ, Mar GY, Hou Charles JY, Li AH, et al. (2011) Clinical Characteristics, Management and In-Hospital Outcomes of Patients with Acute Coronary Syndrome - Observations from the Taiwan ACS Full Spectrum Registry. *Acta Cardiol Sin* 2011;27: 135–44.
- International Epidemiological Association guidelines. Available: [http://www.icaweb.org/index.php?option=com\\_content&view=article&id=15%3Agood-epidemiological-practice-gcp&catid=20%3Agood-epidemiological-practice-gcp&Itemid=43&limitstart=1](http://www.icaweb.org/index.php?option=com_content&view=article&id=15%3Agood-epidemiological-practice-gcp&catid=20%3Agood-epidemiological-practice-gcp&Itemid=43&limitstart=1). Accessed 2011 Jan 28.
- Chesebro JH, Knatterud G, Roberts R, Borer J, Cohen LS, et al. (1987) Thrombolysis in Myocardial Infarction (TIMI) Trial, Phase I: A comparison between intravenous tissue plasminogen activator and intravenous streptokinase. Clinical findings through hospital discharge. *Circulation.* 76(1): 142–54.
- Levey AS, Greene T, Kusek JW (2000) A simplified equation to predict glomerular filtration rate from serum creatinine. *J Am Soc Nephrol* 11: A0828.
- National Kidney Foundation (2002) K/DOQI clinical practice guidelines for chronic kidney disease: evaluation, classification, and stratification. *Am J Kidney Dis.* 39(2 Suppl 1): S1–266.
- Morel O, El Ghannudi S, Jesel L, Radulescu B, Meyer N, et al. (2011) Cardiovascular mortality in chronic kidney disease patients undergoing percutaneous coronary intervention is mainly related to impaired P2Y12 inhibition by clopidogrel. *Am Coll Cardiol.* 57(4): 399–408.
- Keough-Ryan TM, Kiberd BA, Dipchand CS, Cox JL, Rose CL, et al. (2005) Outcomes of acute coronary syndrome in a large Canadian cohort: impact of chronic renal insufficiency, cardiac interventions, and anemia. *Am J Kid Dis* 46: 845–55.
- Masoudi FA, Plomondon ME, Magid DJ, Sales A, Rumsfeld JS (2004) Renal insufficiency and mortality from acute coronary syndromes. *Am Heart J* 147: 623–9.
- Baber U, Stone GW, Weisz G, Moreno P, Dangas G, et al. (2012) Coronary plaque composition, morphology, and outcomes in patients with and without chronic kidney disease presenting with acute coronary syndromes. *5(3 Suppl):* S53–61.
- El-Menyar A, Zubaid M, Sulaiman K, Singh R, Al Thani H, et al. (2010) In-hospital major clinical outcomes in patients with chronic renal insufficiency presenting with acute coronary syndrome: data from a Registry of 8176 patients. *Mayo Clin Proc.* 85(4): 332–40.
- Undas A, Nycz K, Pastuszczak M, Stompor T, Zmudka K (2010) The effect of chronic kidney disease on fibrin clot properties in patients with acute coronary syndrome. *Blood Coagul Fibrinolysis.* 21(6): 522–7.
- Park SH, Kim W, Park CS, Kang WY, Hwang SH, et al. (2009) A comparison of clopidogrel responsiveness in patients with versus without chronic renal failure. *Am J Cardiol.* 104: 1292–1295.
- Angiolillo DJ, Bernardo E, Capodanno D, Vivas D, Sabaté M, et al. (2010) Impact of chronic kidney disease on platelet function profiles in diabetes mellitus patients with coronary artery disease taking dual antiplatelet therapy. *J Am Coll Cardiol.* 55: 1139–1146.
- Woo JS, Kim W, Lee SR, Jung KH, Kim WS, et al. (2011) Platelet reactivity in patients with chronic kidney disease receiving adjunctive cilostazol compared with a high-maintenance dose of clopidogrel: results of the effect of platelet inhibition according to clopidogrel dose in patients with chronic kidney disease (PIANO-2 CKD) randomized study. *Am Heart J.* 162(6): 1018–25.



24. James S, Budaj A, Aylward P, Buck KK, Cannon CP, et al. (2010) Ticagrelor versus clopidogrel in acute coronary syndromes in relation to renal function: results from the Platelet Inhibition and Patient Outcomes (PLATO) trial. *Circulation*. 122(11): 1056–67.
25. Kaufman JS, Fiore L, Hasbargen JA, O'Connor TZ, Perdriset G (2000) A pharmacodynamic study of clopidogrel in chronic hemodialysis patients. *J Thromb Thrombolysis*. 10: 127–131.
26. Cuisset T, Frere C, Moro PJ, Quilici J, Pons C, et al. (2010) Lack of effect of chronic kidney disease on clopidogrel response with high loading and maintenance doses of clopidogrel after Acute Coronary Syndrome. *Thromb Res*. 126(5): e400–2.
27. Arai T, Kawamura A, Matsubara Y, Yokoyama K, Ikeda Y, et al. (2012) Effect of chronic kidney disease on platelet reactivity to dual-antiplatelet therapy in patients treated with drug-eluting stents. *Heart Vessels*. 27(5): 480–5.
28. Keltai M, Tonelli M, Mann JF, Sitkei E, Lewis BS, et al. (2007) Renal function and outcomes in acute coronary syndrome: impact of clopidogrel. *Eur J Cardiovasc Prev Rehabil*. 14(2): 312–8.
29. Best PJ, Steinhubl SR, Berger PB, Dasgupta A, Brennan DM, et al. (2008) The efficacy and safety of short- and long-term dual antiplatelet therapy in patients with mild or moderate chronic kidney disease: results from the Clopidogrel for the Reduction of Events During Observation (CREDO) trial. *Am Heart J*. 155(4): 687–93.
30. Htun P, Fateh-Moghadam S, Bischofs C, Banya W, Müller K, et al. (2011) Low responsiveness to clopidogrel increases risk among CKD patients undergoing coronary intervention. *J Am Soc Nephrol*. 22(4): 627–33.
31. Palmer SC, Di Micco L, Razavian M, Craig JC, Perkovic V, et al. (2012) Effects of antiplatelet therapy on mortality and cardiovascular and bleeding outcomes in persons with chronic kidney disease: a systematic review and meta-analysis. *Ann Intern Med*. 156(6): 445–59.
32. Valente S, Lazzeri C, Chiostrì M, Osmanagaj L, Giglioli C, et al. (2011) STEMI patients—the more you bleed, the more you die: a comparison between classifications. *Clin Cardiol*. 34(2): 90–6.
33. Suh JW, Mehran R, Claessen BE, Xu K, Baber U, et al. (2011) Impact of in-hospital major bleeding on late clinical outcomes after primary percutaneous coronary intervention in acute myocardial infarction the HORIZONS-AMI (Harmonizing Outcomes With Revascularization and Stents in Acute Myocardial Infarction) trial. *J Am Coll Cardiol*. 258(17): 1750–6.
